# Supplementary material
Source: PubMed Central journal article supplement (PMC4683412)
Supplement: NIHMS739383-supplement-1.pdf [file NIHMS739383-supplement-1.pdf]

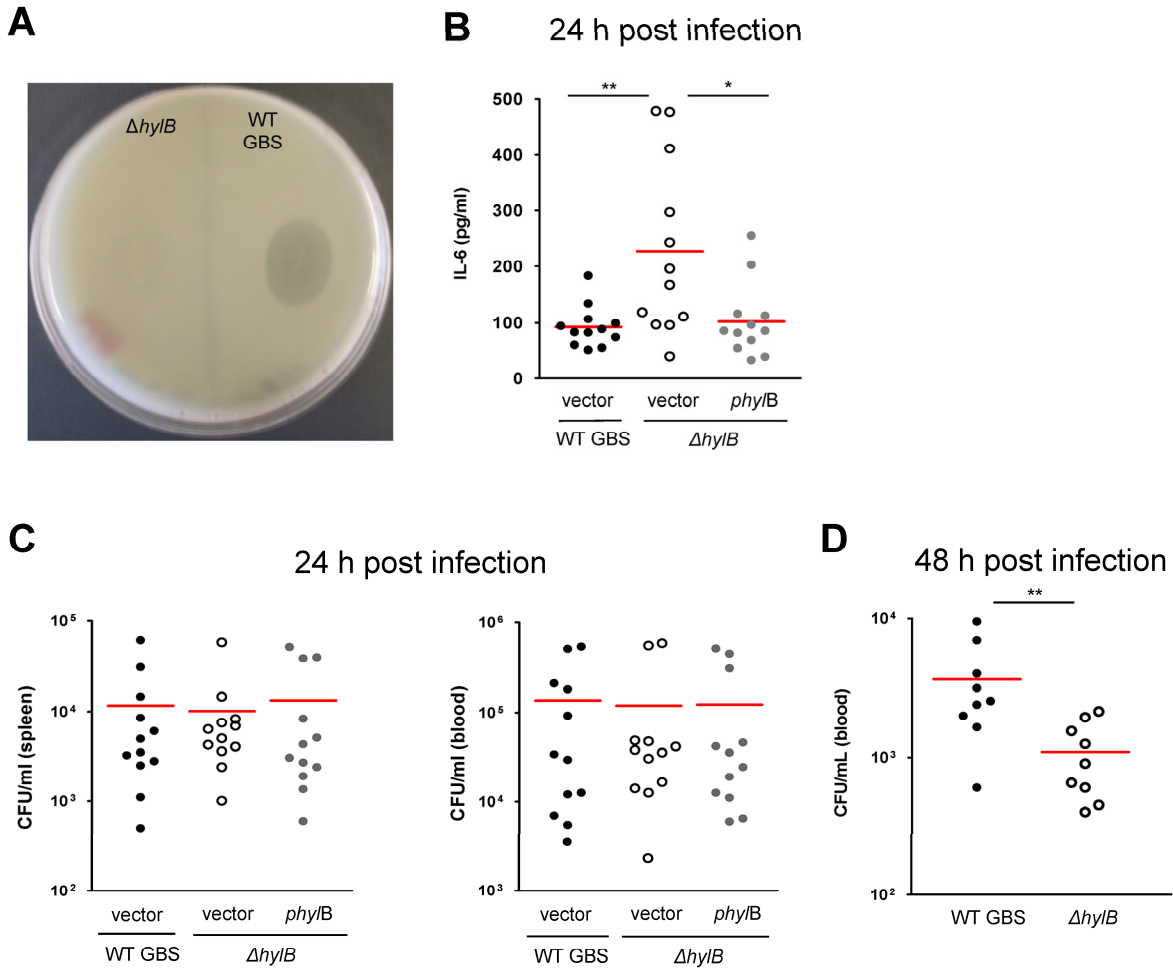

**Figure S1, related to Figure 1. IL-6 production and bacterial burden after infection of CD1 mice with WT or  $\Delta$ *hylB* GBS.**

(A) Overnight bacterial culture supernatants from WT and  $\Delta$ *hylB* GBS were added to a hyaluronan agar plate. The plate was visualized after 24 h for a zone of clearance as an indication of the presence of hyaluronidase activity. (B-C) CD1 mice (n = 12 per group) were infected i.p. with WT,  $\Delta$ *hylB*, or the complemented  $\Delta$ *hylB* GBS strain. (B) IL-6 in the spleen and (C) CFU in the blood and spleen were determined after 24 h. (D) CD1 mice were infected i.p. with either WT or  $\Delta$ *hylB* and CFU in the blood determined

after 48 hours. Data analysis was performed using ANOVA for (B) and (C) and unpaired two-tailed *t*-test for (D). \**P* < 0.05 and \*\**P* < 0.01.

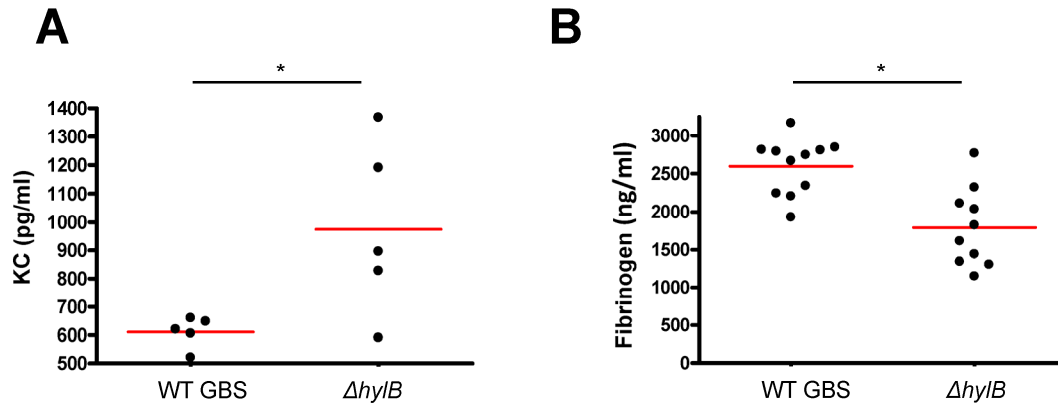

**Figure S2, related to Figure 1. Immunopathologic findings in C57BL/6 mice 48 h after infection with WT or  $\Delta hyIB$  GBS.**

Mice were injected i.p. with either WT or  $\Delta hyIB$  GBS and spleens were harvested after 48 h. Homogenized spleens were assayed for (A) KC (n=5 per group) or (B) fibrinogen by ELISA ( $P=0.06$ ; n=10 per group). Each data point represents an individual mouse. Data analysis was performed using Mann-Whitney U for (A) and unpaired two-tailed  $t$ -test for (B). \* $P < 0.05$ .

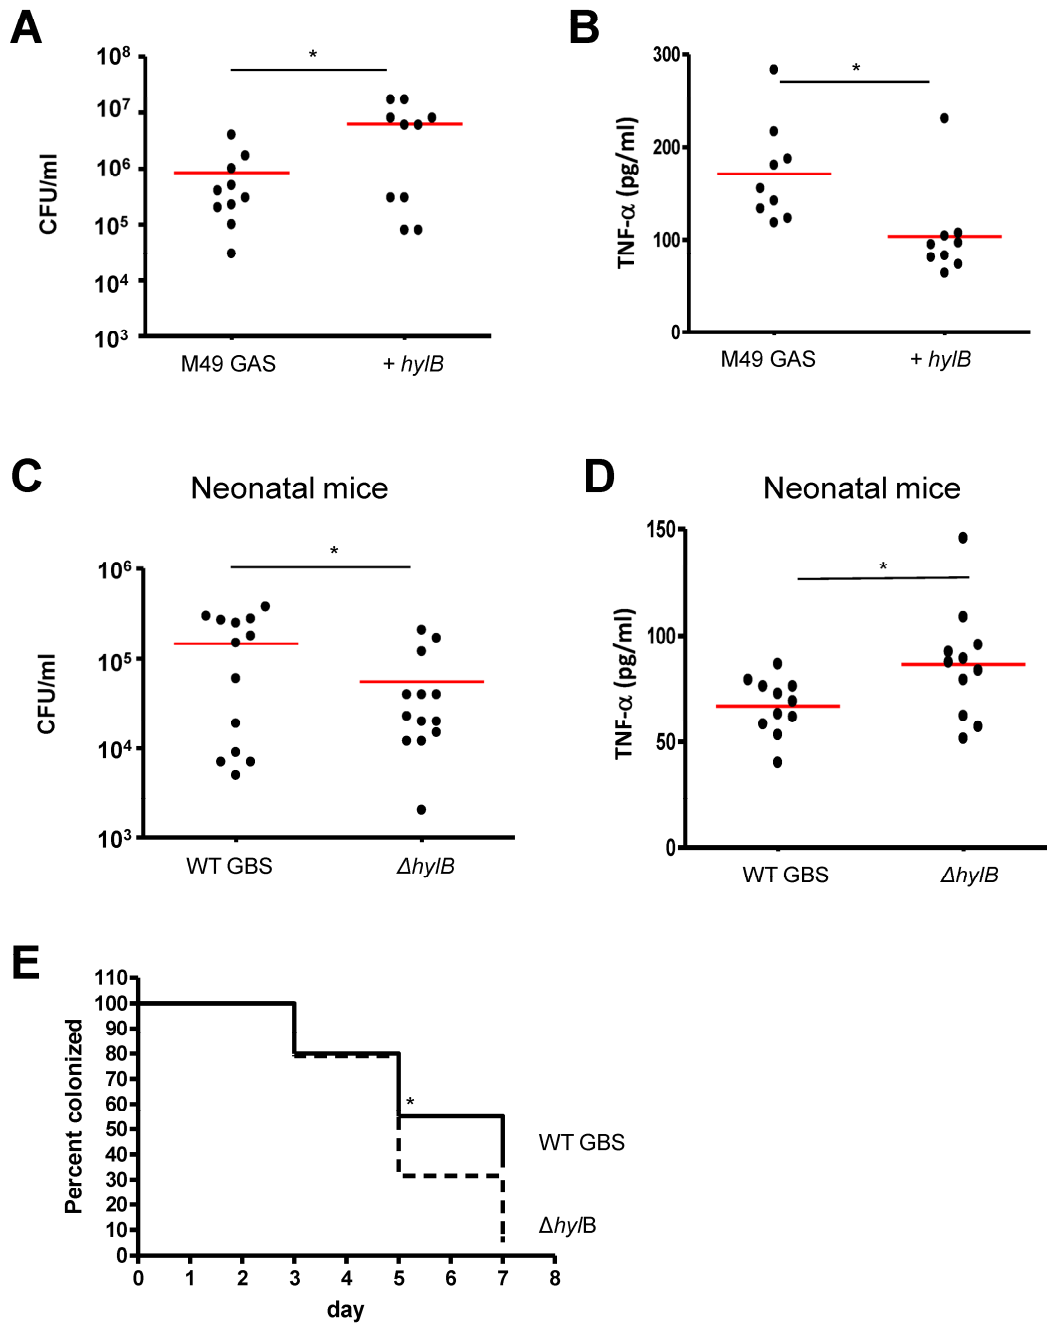

**Figure S3, related to Figure 1. GBS hyaluronidase reduces inflammation in GAS and GBS murine models.**

(A-B) C57BL/6 mice were injected i.p. with either WT GAS (no hyaluronidase) or GAS expressing hyaluronidase from GBS. (A) CFU and (B) TNF- $\alpha$  from the spleen were

determined after 48 h. (C-D) Infection of neonatal mice. Four day old C57BL/6 pups were injected i.p. with WT or  $\Delta hyIB$  GBS. After 48 h, kidneys were homogenized and (C) bacterial loads and (D) TNF- $\alpha$  levels were enumerated. (E) Mice were administered WT or  $\Delta hyIB$  GBS into the vaginal lumen as described in Figure 1H. The vaginal cavities were swabbed every other day and percentage of mice remaining colonized analyzed. Each data point represents an individual mouse. Data analysis was performed by Mann-Whitney U for (A) and (B), by unpaired two-tailed  $t$ -test for (C) and (D) and Fisher exact test for (E). \* $P < 0.05$ .

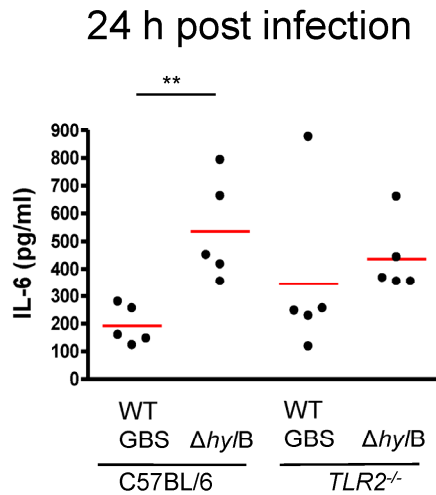

**Figure S4, related to Figure 2. Bacterial burden, cytokine production, and host survival in WT C57BL/6 and TLR2<sup>-/-</sup> after infection with WT or  $\Delta hyIB$  GBS.**

(A) WT C57BL/6 and TLR2<sup>-/-</sup> mice were injected i.p. with either WT or  $\Delta hyIB$  GBS. IL-6 from the spleen was determined at 24 h. Analysis was performed using Mann-Whitney U. *P*-value: \*\**P* < 0.01.

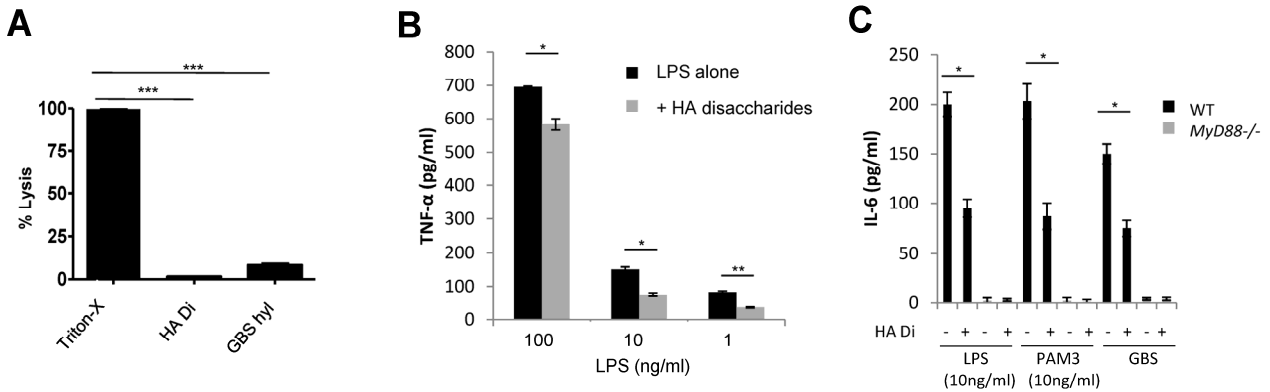

**Figure S5, related to Figure 3. Toxicity of HA disaccharides and effect of HA disaccharides on LPS-, PAM<sub>3</sub>CSK<sub>4</sub>-, and CpG- induced TNF- $\alpha$  release.**

(A) Toxicity of HA disaccharides. BMDM were incubated for 6 h with HA disaccharides (10  $\mu$ g/ml), GBS hyaluronidase (0.5mg/ml), or Triton X-100. An LDH assay was performed to quantify cell death. (B-C) Murine BMDM (WT or *MyD88*<sup>-/-</sup>) were stimulated with LPS, Pam<sub>3</sub>CSK<sub>4</sub> or GBS in the presence or absence of HA disaccharides. Supernatants were collected after 4 h for TNF- $\alpha$  or IL-6 determination. (B) Effect of varying LPS dose with HA disaccharides maintained at 10  $\mu$ g/ml. (C) Effect of HA disaccharides (10  $\mu$ g/ml) on stimulation of WT and *MyD88*<sup>-/-</sup> macrophages by various agonists. Data are shown as mean  $\pm$  SD, where \**P* < 0.05. \*\*\**P* < 0.001, and results from (A) to (C) each are representative of three experiments. Data analysis was performed using ANOVA for (A) and (C), and unpaired two-tailed *t*-test for (B).

**Table S1, related Figures 1 and 5. Strains, plasmids, and primers used in this study**

| Strain, plasmid, or primer                                                 | Genotype or description                                                                                                                                                                                                       | Reference or source |
|----------------------------------------------------------------------------|-------------------------------------------------------------------------------------------------------------------------------------------------------------------------------------------------------------------------------|---------------------|
| <b>Bacterial Strains</b>                                                   |                                                                                                                                                                                                                               |                     |
| <i>E. coli</i> DH5 $\alpha$                                                | $\phi$ 80 $\Delta(lacZ)$ M15 $\Delta(argF-lac)$ U169 <i>endA1</i><br><i>recA1</i> <i>hsdR17</i> (r-K m-K) <i>deoR</i> <i>thi-1</i> <i>supE44</i> <i>gyrA96</i> <i>relA1</i>                                                   | Lab stocks          |
| <i>E. coli</i> MC1061                                                      | F <sup>-</sup> <i>araD139</i> $\Delta(ara-leu)$ 7696 <i>galE15</i> <i>galK16</i> $\Delta(lac)$ X74<br><i>rpsL</i> (Str <sup>R</sup> ) <i>hsdR2</i> ( <i>rK</i> <sup>-</sup> <i>mK</i> <sup>+</sup> ) <i>mcrA</i> <i>mcrB1</i> | Lab stocks          |
| GAS M49                                                                    | Wild-type clinical isolate                                                                                                                                                                                                    | Lab stocks          |
| GBS A909                                                                   | Wild-type clinical isolate                                                                                                                                                                                                    | Lab stocks          |
| <i>S. aureus</i> Newman                                                    | Wild-type lab strain                                                                                                                                                                                                          | Lab stocks          |
| $\Delta$ <i>hylB</i>                                                       | GBS A909 <i>hylB</i> mutant                                                                                                                                                                                                   | This study          |
| $\Delta$ <i>hylB</i> + <i>phylB</i>                                        | GBS A909 <i>hylB</i> mutant complement with <i>hylB</i>                                                                                                                                                                       | This study          |
| $\Delta$ <i>hylB</i> + <i>S. aureus</i> hyl                                | GBS A909 <i>hylB</i> mutant complement with <i>hysA</i> hyl gene from <i>S. aureus</i> Newman                                                                                                                                 | This study          |
| $\Delta$ <i>hylB</i> + <i>S. coelicolor</i> hyl                            | GBS A909 <i>hylB</i> mutant complement with hyl gene from <i>S. coelicolor</i>                                                                                                                                                | This study          |
| GAS M49 + <i>phylB</i>                                                     | GAS M49 complement with <i>phylB</i>                                                                                                                                                                                          | This study          |
| <b>Plasmids</b>                                                            |                                                                                                                                                                                                                               |                     |
| pDCerm                                                                     | Shuttle vector encoding erythromycin resistance cassette                                                                                                                                                                      | Jeng et al. 2003    |
| pKODestErm                                                                 | Created for Gateway cloning                                                                                                                                                                                                   | Locke et al. 2007   |
| pUC19                                                                      | Amp shuttle vector                                                                                                                                                                                                            | Invitrogen          |
| <b>Primers</b>                                                             |                                                                                                                                                                                                                               |                     |
|                                                                            | 5'-3' orientation                                                                                                                                                                                                             |                     |
| <u><i>GBS</i> <math>\Delta</math><i>hylB</i></u>                           |                                                                                                                                                                                                                               |                     |
| <i>hylB</i> upst fwd                                                       | ATC CCGCGG CGAGCTGTTCTCTAACCCTA                                                                                                                                                                                               | This study          |
| <i>hylB</i> dwnst rev                                                      | ATC GGATCC ACATACCTTATTGGTGCCGACGGT                                                                                                                                                                                           | This study          |
| <i>hylB</i> upstr/cat rev                                                  | ATATCCAGTGATTTTTTCTCCAT<br>GTGTGCTACTTTGATAGTAAATTGCC                                                                                                                                                                         | This study          |
| <i>hylB</i> dwnstr/cat fwd                                                 | GCGATGAGTGGCAGGGCGGGGCGTAAACTTGGGCTGTTA<br>TCAAACACGA                                                                                                                                                                         | This study          |
| cat fwd                                                                    | ATGGAGAAAAAATCACTGGATATACCACC                                                                                                                                                                                                 | This study          |
| cat rev                                                                    | ATGGAGAAAAAATCACTGGATATACCACC                                                                                                                                                                                                 | This study          |
| <u>Complement</u>                                                          |                                                                                                                                                                                                                               |                     |
| <i>hylB</i> compl fwd                                                      | AGGCAATTTACTATCAAAGTAGCAC                                                                                                                                                                                                     | This study          |
| <i>hylB</i> compl rev                                                      | TGCTGTAGAAGCCAAGTATG                                                                                                                                                                                                          | This study          |
| <u><math>\Delta</math><i>hylB</i> + <i>S. aureus</i> hyl (<i>hysA</i>)</u> |                                                                                                                                                                                                                               |                     |
| <i>hysA</i> fwd                                                            | GTTTGGTCGTCTAAAGTAATGTTGC                                                                                                                                                                                                     | This study          |
| <i>hysA</i> rev                                                            | CAAAGGGGATGTGGTCTGCG                                                                                                                                                                                                          | This study          |
